# Supplementary material for: Potential Osteoporosis Recovery by Deep Sea Water through Bone Regeneration in SAMP8 Mice
Source: Hindawi journal article supplement (doi:10.1155/2013/161976), 2013-01-01
Supplement: f1 [file 161976.f1.pdf]

**Table 1. Elements content in DSW**

| Elments    | DSW (mg/L) |
|------------|------------|
| Magnesium  | 96200      |
| Potassium  | 10800      |
| Sodium     | 9010       |
| Calcium    | 39         |
| Fluorine   | 22.4       |
| Lithium    | 17.1       |
| Silicon    | 2.48       |
| Strontium  | 0.55       |
| Molybdenum | 0.47       |
| Nickel     | 0.05       |
| Zinc       | 0.0038     |
| Iron       | 0.0033     |
| Manganese  | 0.0016     |
